# Supplementary material for: Construction of a nanocavity structure with a carrier-selective layer for enhancement of photocatalytic hydrogen production performance
Source: Royal Society of Chemistry journal article supplement (doi:10.1039/c9se00987f), 2019-12-14
Supplement: c9se00987f1.pdf [file c9se00987f1.pdf]

## Electronic Supplementary Information

### **Construction nanocavity structure with carrier-selective layer for enhancement photocatalytic hydrogen production performance**

Qin Lei<sup>1</sup>, Rongzhi Chen<sup>1,2\*</sup>, Jihua Tan<sup>1\*</sup>, Xinxin Long<sup>1</sup>, Huanyu Chen<sup>1</sup>, Xinming Wang<sup>1,2</sup>, Jingfu Liu<sup>1,3</sup>, Zhongfang Lei<sup>4</sup>, Zhenya Zhang<sup>4</sup>

<sup>1</sup>College of Resources and Environment, University of Chinese Academy of Sciences, Yuquan Road 19A, Beijing 100049, China

<sup>2</sup>State Key Laboratory of Organic Geochemistry and Guangdong Key Laboratory of Environmental Protection and Resources Utilization, Guangzhou Institute of Geochemistry, Chinese Academy of Sciences, Guangzhou 510640, China

<sup>3</sup>State Key Laboratory of Environmental Chemistry and Ecotoxicology, Research Center for Eco-Environmental Sciences, Chinese Academy of Sciences, Beijing 100085, China

<sup>4</sup>Graduate School of Life and Environmental Sciences, University of Tsukuba, 1-1-1 Tennodai, Tsukuba, Ibaraki 305-8572, Japan

\*Corresponding author

## Experimental section

### **Photodeposition and physical mixed Au/CdS NWs photocatalysts preparation.**

The in-situ photodeposition 4% Au/CdS composite was prepared via photo reduction method.<sup>S1</sup> In a typical process, a certain amount CdS powder was placed in 50 mL isopropanol aqueous solution (50%, v/v) in a photo reactor. A certain amount of HAuCl<sub>4</sub> (1%, wt/wt) aqueous solution was injected into the reactor sealed with a rubber septum. The reactor was purged with argon (Ar) gas for 30 min to remove oxygen. The mixture was irradiated by UV light under magnetic stirring for 2 h. Then, the solution was centrifuged, washed with distilled water and isopropanol to remove impurities, and obtained the samples after drying.

The physical mixed Au/CdS NWs samples were obtained by directly mixing CdS NWs and Au NPs (the average size is 11 nm) sol. The 11 nm Au NPs sol were prepared by a literature reported method. Typically, 0.5 mL HAuCl<sub>4</sub> (1%, wt/wt) were added into 50 mL deionized water, after the mixture solution were heated to 95 °C, 1.5 mL sodium citrate (1%, wt/wt) aqueous solution were injected, and continue the reaction for 20 min. The 11 nm Au NPs sol samples were obtained after centrifugal treatment, washing to obtain Au NPs sample. The morphology and UV-vis absorption of preparation Au NPs sol are shown in Fig. S17. The physical mixed 4% Au/CdS NWs samples were obtained by mixing the certain amount of Au NPs and CdS NWs.

**The detection of Cd<sup>2+</sup> concentration in residual solution after hydrothermal reaction.** The residual Cd<sup>2+</sup> in 2% Au and 10% Au system were detected by fluorescent spectrometry. The mechanism can be described as follow: the S<sup>2-</sup> can reaction with Cd<sup>2+</sup> to form CdS, which has a characteristic emission peak center at about 500-600 nm.<sup>S2</sup> In a typically process, 0.5 mL supernatant solution after hydrothermal reaction was filtrated via organic membrane. Then, the obtained solution was diluted to 7 mL, excess Na<sub>2</sub>S aqueous solution (0.1 mol·L<sup>-1</sup>) were added under stirring condition, and continue stirring for 10 min. The measurements of PL spectra were carried out with a 460 nm light excitation and the results were presented in Fig. S7.

**The calculation of photocatalyst band gap and band position.** The band gap of

samples was transferred via K-M equation and the results were shown in Fig. S23a.<sup>S3</sup> To study the band position of our photocatalysts, we subjected the CdS NWs and Au/CdS@Au-S composites electrode to measure flat band potential via electrochemical impedance-potential technique. The obtained Motte-Schottky plots are shown in Fig. S23b. Motte-Schottky plot of data analyzed using fitting method obeys Ref. S4. Above experiments were carried out in 0.1 mol·L<sup>-1</sup> H<sub>2</sub>SO<sub>4</sub> solution at a fix frequency of 1000 Hz within the potential region of -1.5 to 1.5 V vs. Hg/HgCl<sub>2</sub> reference electrode. Variation of capacitance (C) with applied potential is shown by the Motte-Schottky equation (1):

$$\frac{1}{C^2} = \frac{2}{\varepsilon \cdot \varepsilon_0 \cdot e_0 \cdot A^2 \cdot N_D} (E - E_{FB} - \frac{kT}{e_0}) \quad (1)$$

where C is the space charge capacitance,  $\varepsilon$  and  $\varepsilon_0$  are the permittivity of the electrode and free space,  $e_0$  is the elementary charge, A is the electrochemical specific surface area, E is the applied potential,  $E_{FB}$  is the flat band potential, k is the Boltzmann's Constant and T is the temperature.

The positive slope of the plot confirms the n-type behavior of the CdS NWs and Au/CdS@Au-S composites, and the flat-band potentials of photocatalysts calculated from the x intercepts of the linear region, is 0.001 and -0.019 V vs. Hg/HgCl<sub>2</sub>, respectively. Generally, the potential measured against an Hg/HgCl<sub>2</sub> reference can be converted into reversible hydrogen electrode (RHE) potentials by using Eq. (2):

$$E_{FB} \text{ (vs. RHE)} = E_{FB} \text{ (SCE)} + E_{SCE} + 0.059\text{pH} \quad (2)$$

The measured pH value of the electrolyte is approximately 1, and  $E_{SCE}=0.24$  V. Therefore, the calculated flat-band positions of CdS NWs and Au/CdS@Au-S composites are 0.30 and 0.28 V vs. RHE (pH=0), respectively. Based on the results of band gap (Fig. S23a) and XPS valance results (Fig. S23c), thus, the corresponding conduction band (CB) and the valence band (VB) found at -0.35 and 2.05 V for CdS NWs, and -0.48 and 1.84 V for Au/CdS@Au-S vs. RHE, respectively (Fig. S23d).

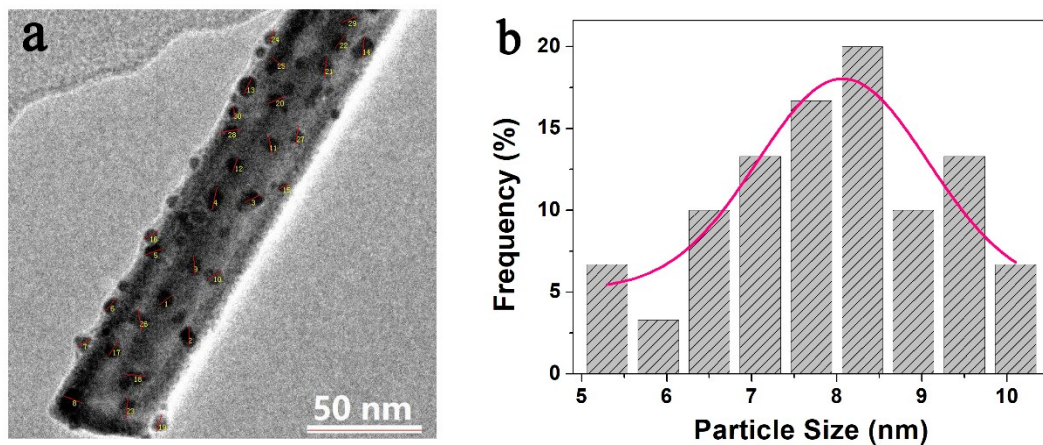

**Fig. S1** The size statistics of Au NPs in Au/CdS@Au-S photocatalysts. (a) The statistic region, and (b) the result of size distribution.

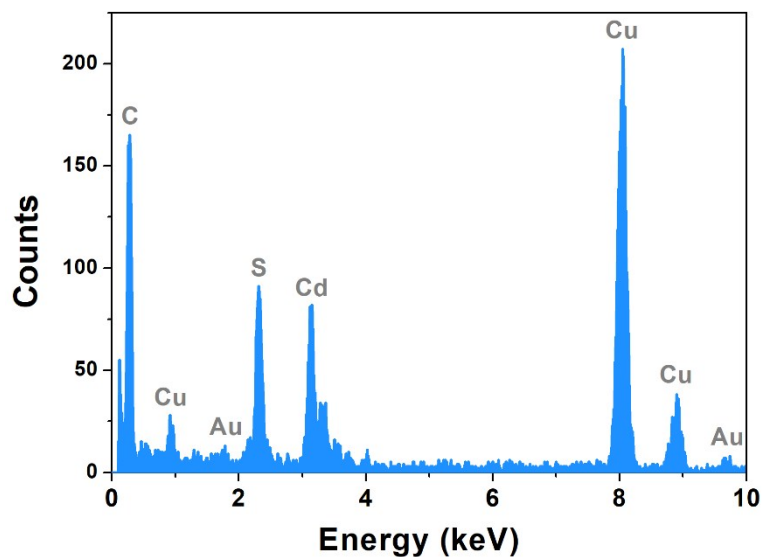

**Fig. S2** The EDS of Au/CdS@Au-S photocatalysts.

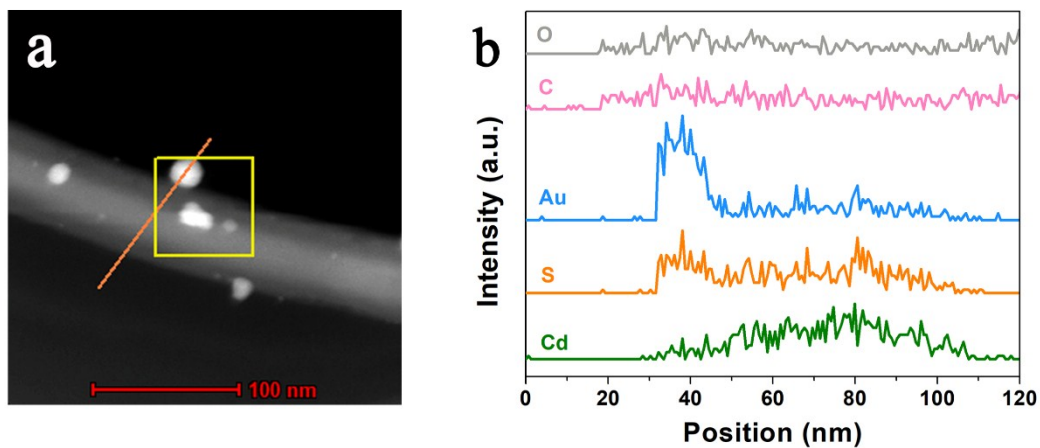

**Fig. S3** The TEM linear sweep image of Au/CdS@Au-S photocatalysts. (a) The scanning area, and (b) the elements distribution at different position.

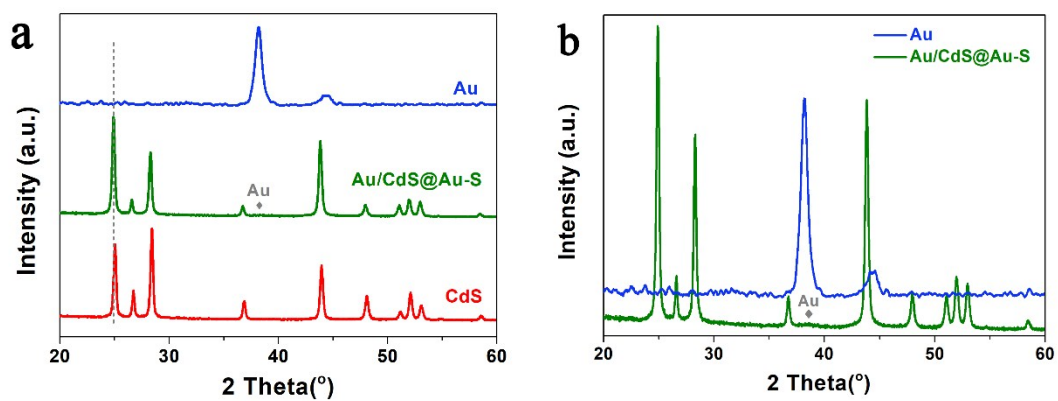

**Fig. S4** (a) The XRD patterns of as-prepared samples and (b) the amplification patterns of Au and Au/CdS@Au-S.

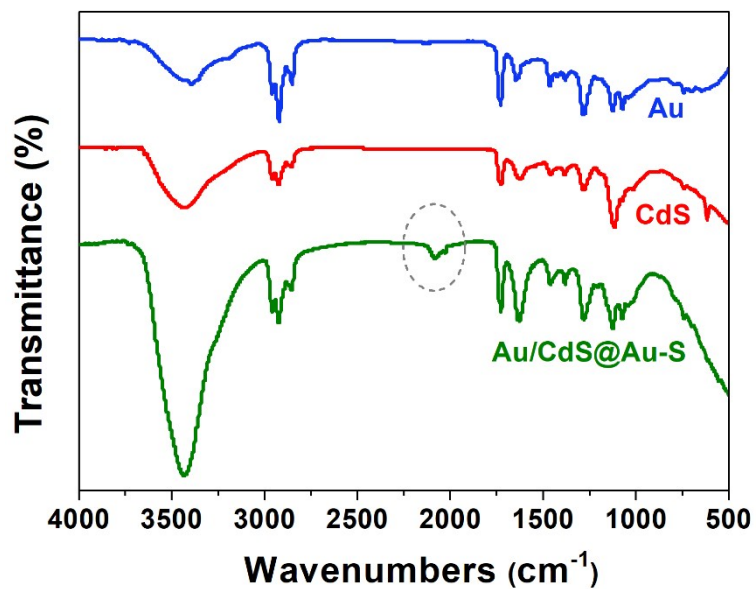

**Fig. S5** The FTIR spectra of as-prepared CdS NWs, Au NPs and Au/CdS@Au-S samples.

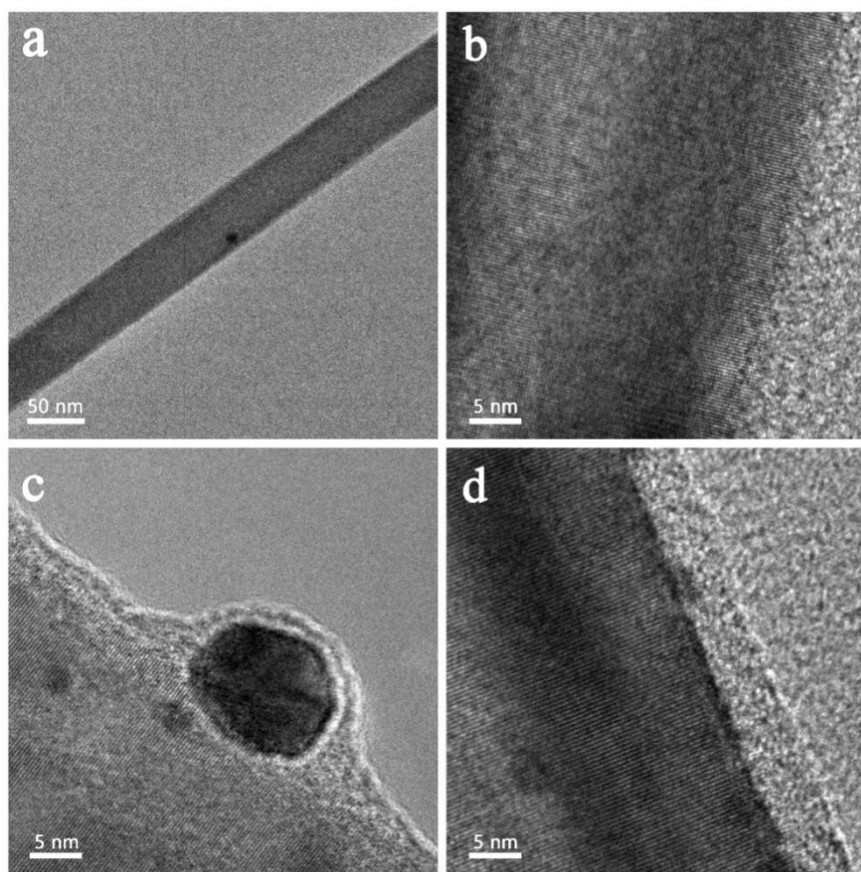

**Fig. S6** The Au-S covering thickness change with the amount of  $\text{HAuCl}_4$  at the Au addition of (a) 0.5%, (b) 0.5%, (c) 4% and (d) 10%, respectively.

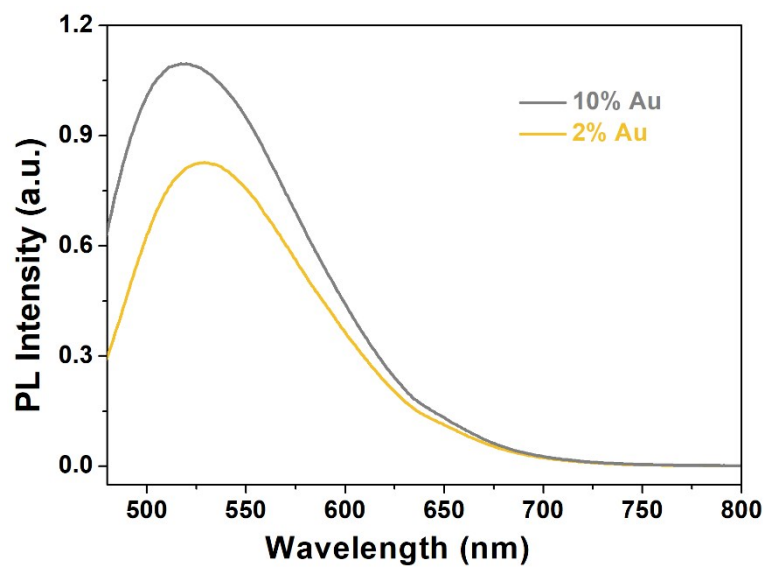

**Fig. S7** The PL spectra of formed CdS with different hydrothermal reaction residual solution.

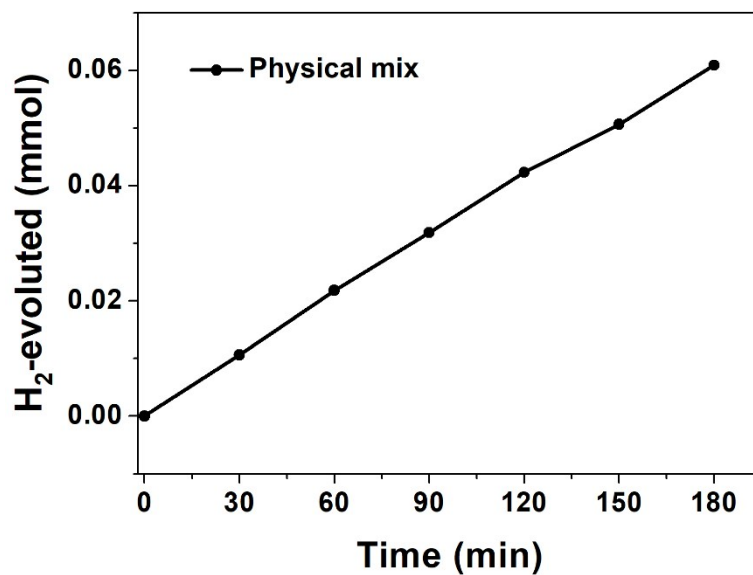

**Fig. S8** Comparison in hydrogen evolution activity of Au/CdS NWs from different preparation methods.

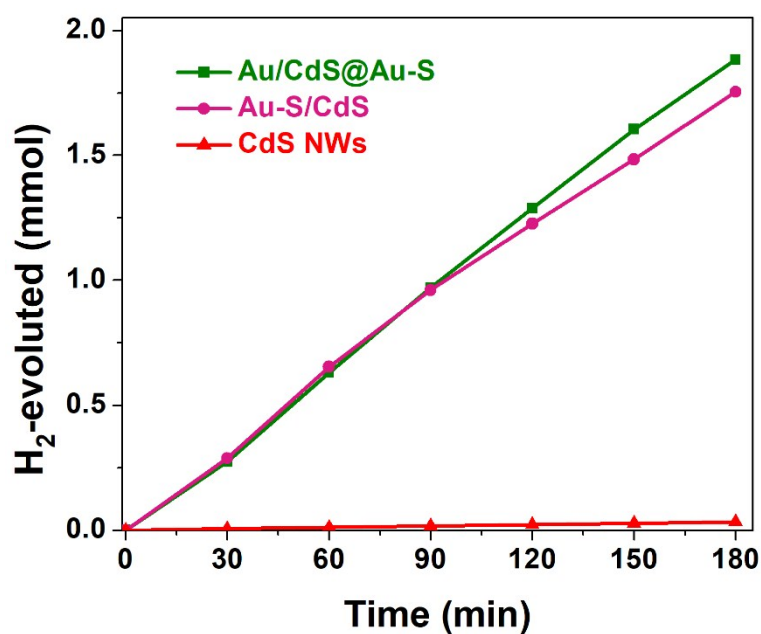

**Fig. S9** The photocatalytic hydrogen production activity comparison on CdS, Au-S/CdS and Au/CdS@Au-S photocatalyst under the same condition.

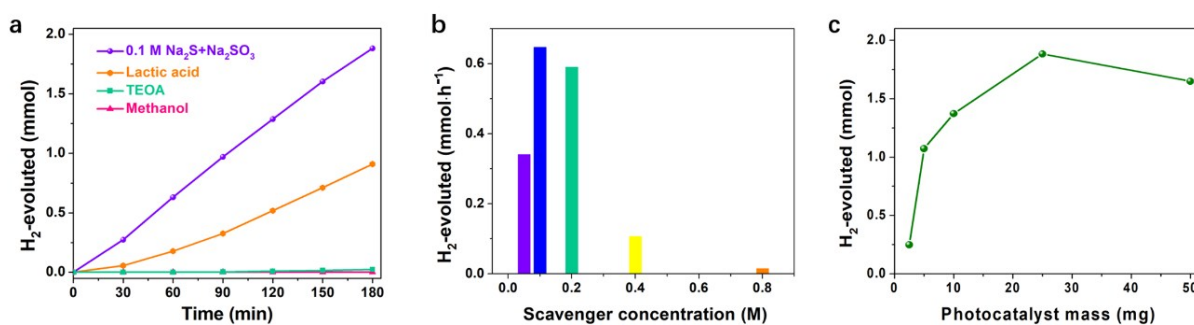

**Fig. S10** (a) The photocatalytic hydrogen production activity over 25 mg Au/CdS@Au-S photocatalyst under various scavenger, the concentration of lactic acid, TEOA and methanol all is 10% (v/v), (b) the photocatalytic hydrogen production activity over 25 mg Au/CdS@Au-S photocatalyst at different concentrations of Na<sub>2</sub>S and Na<sub>2</sub>SO<sub>3</sub> (the concentration of Na<sub>2</sub>S and Na<sub>2</sub>SO<sub>3</sub> is the same) and (c) the relationship of hydrogen performance and photocatalyst mass.

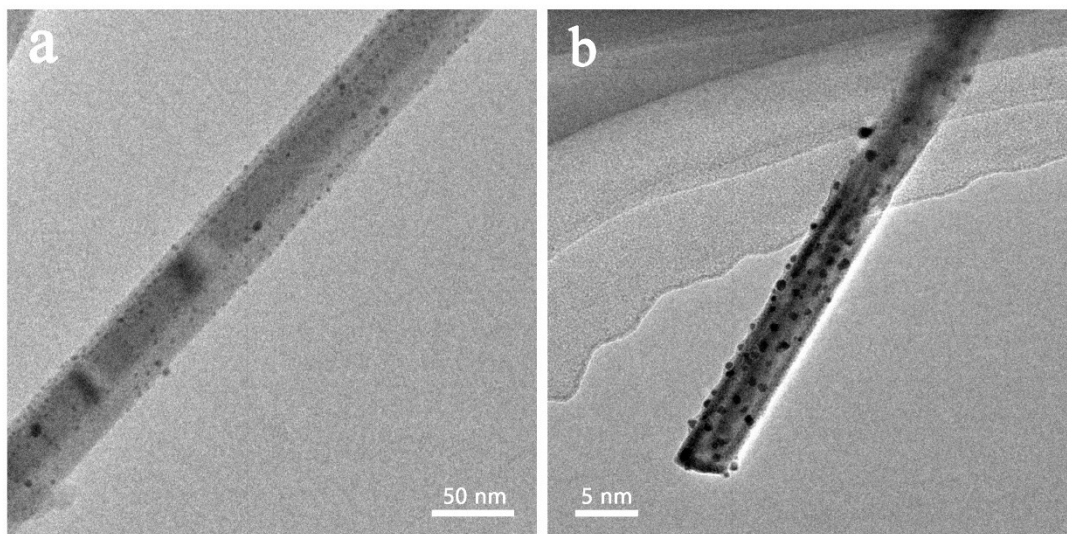

**Fig. S11** The TEM images of Au/CdS@Au-S samples at Au addition of (a) 10% and (b) 4%.

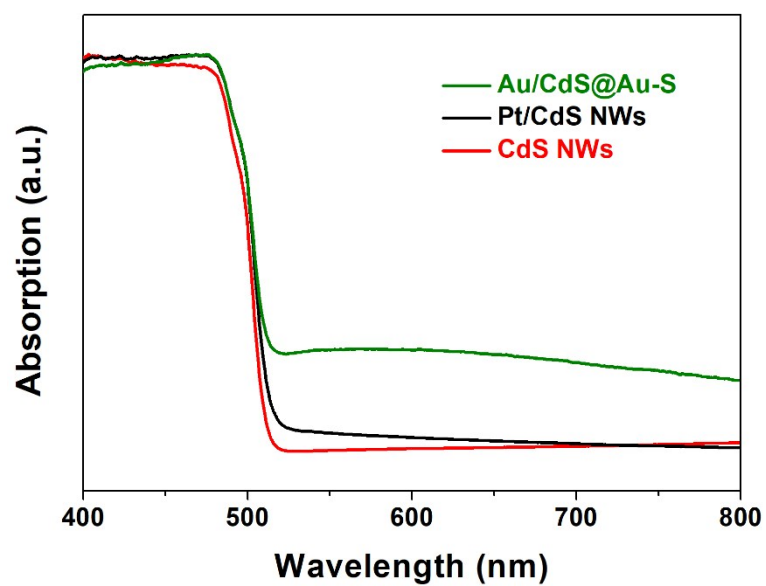

**Fig. S12** The UV-Vis spectra of different photocatalysts.

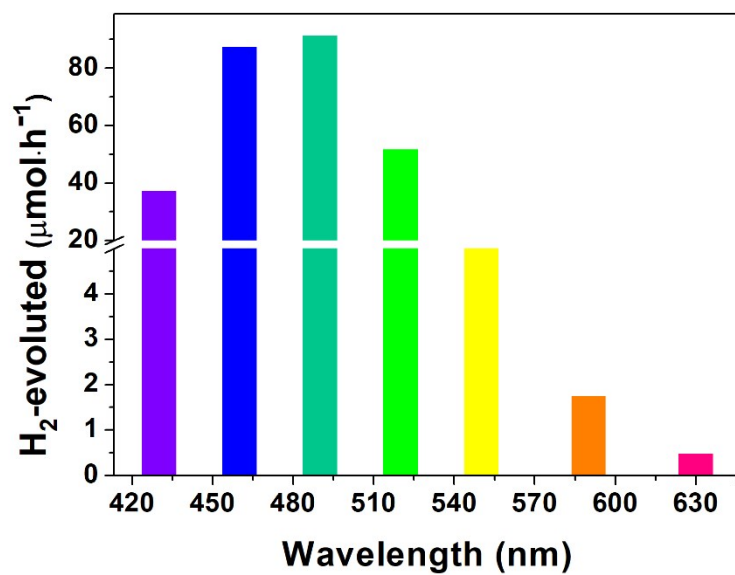

**Fig. S13** Changes in hydrogen evolution activity under different wavelength light irradiations.

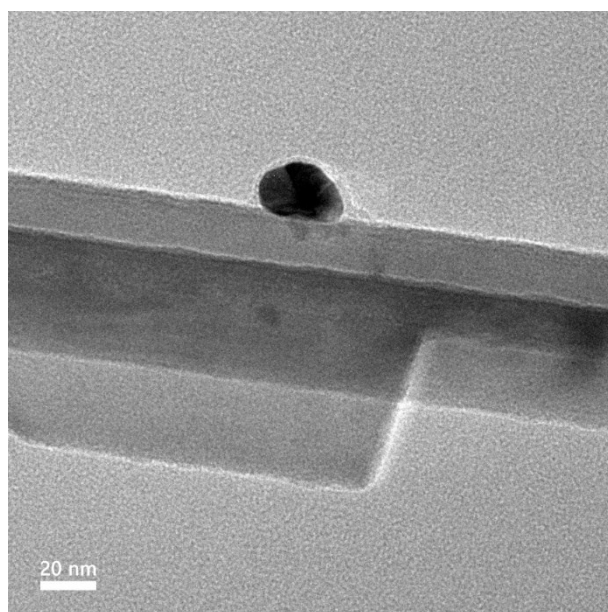

**Fig. S14** The TEM image of Au/CdS@Au-S after photocatalytic reaction.

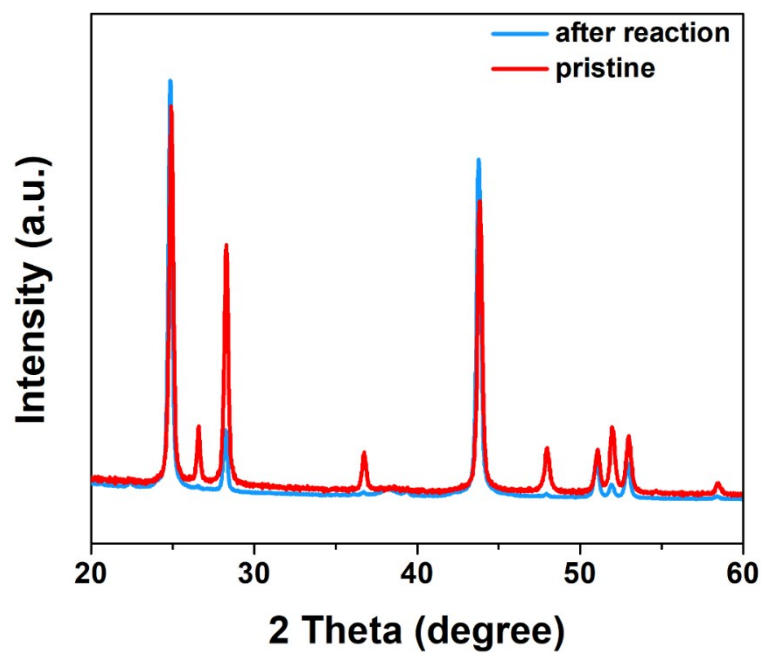

**Fig. S15** The XRD patterns of Au/CdS@Au-S photocatalyst before and after photocatalytic reaction.

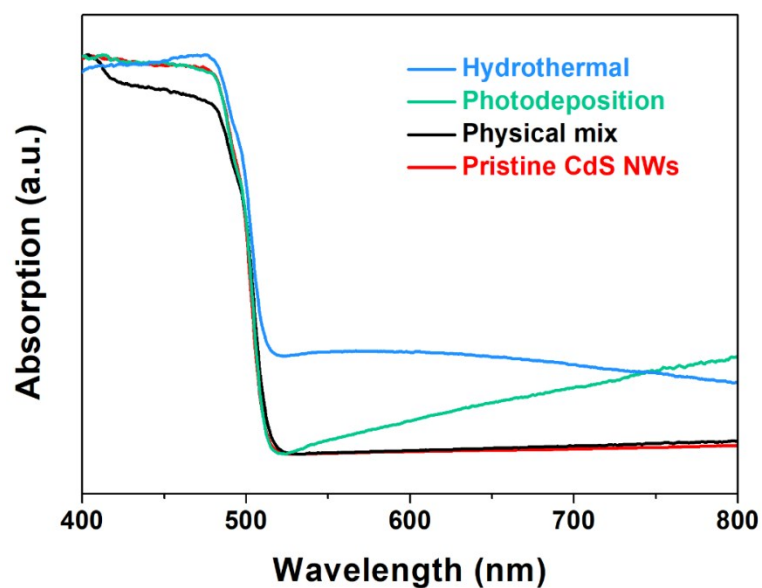

**Fig. S16** The UV-vis spectra of Au combined CdS NWs photocatalysts via different route preparation.

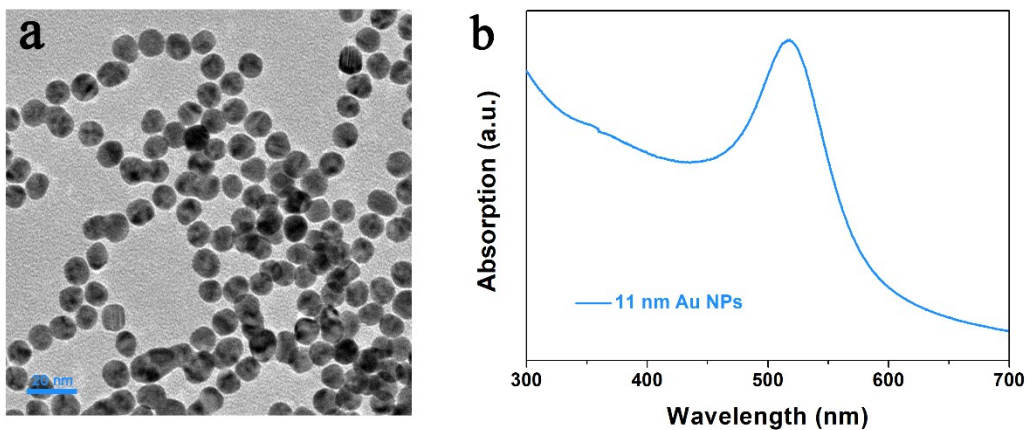

**Fig. S17** (a) The TEM image and (b) UV-vis absorption spectrum of prepared Au NPs sol.

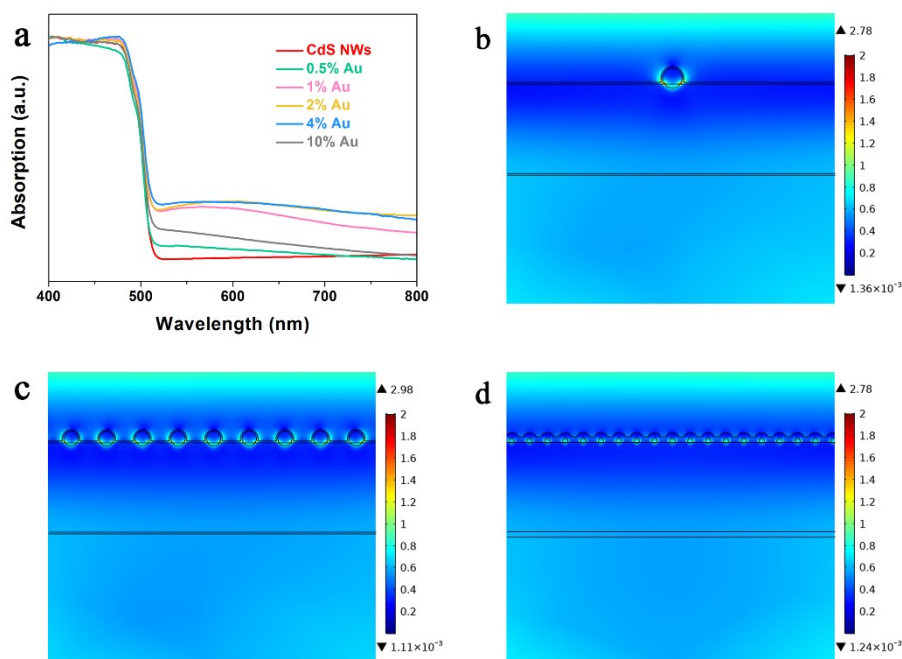

**Fig. S18** Optical absorption and electromagnetic field simulation of photocatalysts. (a) The UV-vis spectra of Au/CdS@Au-S NWs photocatalysts with different Au addition amount. The electromagnetic field distributions on the surface of the Au/CdS@Au-S with Au addition amount of (b) 0.5%, (c) 4% and (d) 10%, respectively. The wavelength of the incident light was 520 nm.

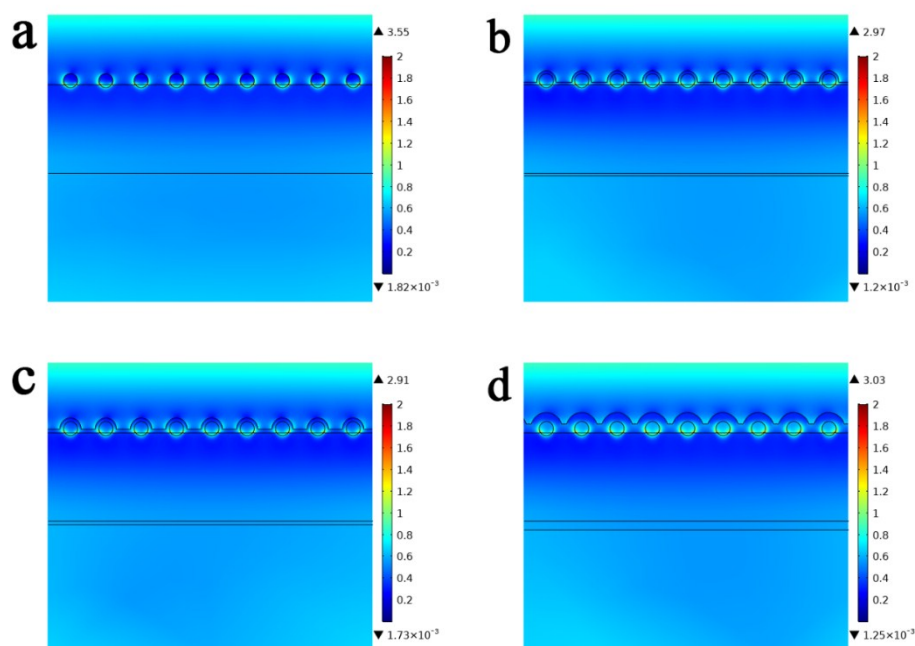

**Fig. S19** Local electric field contours for Au/CdS@Au-S plasmonic nanocavities structures with different Au-S shell layer thickness: (a) 0 nm (bare Au/CdS NWs), (b) 1.5 nm, (c) 2.0 nm, and (d) 5.0 nm.

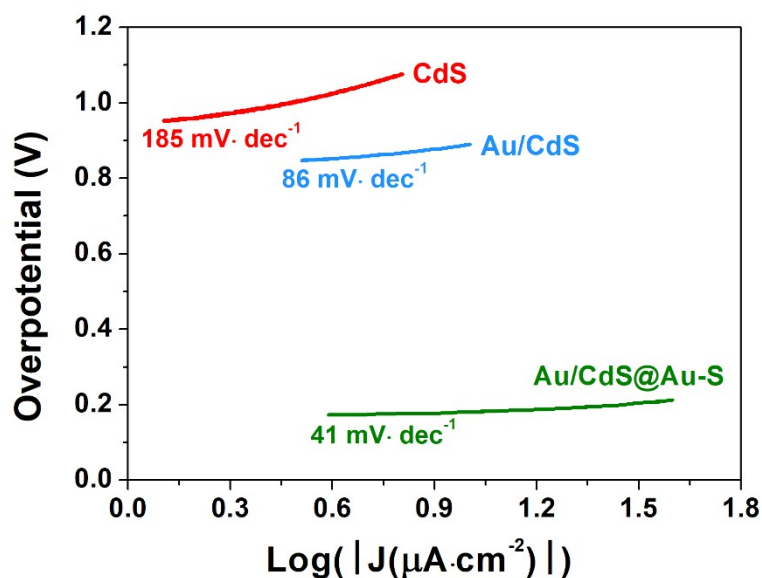

**Fig. S20** The Tafel curves of different photocatalysts.

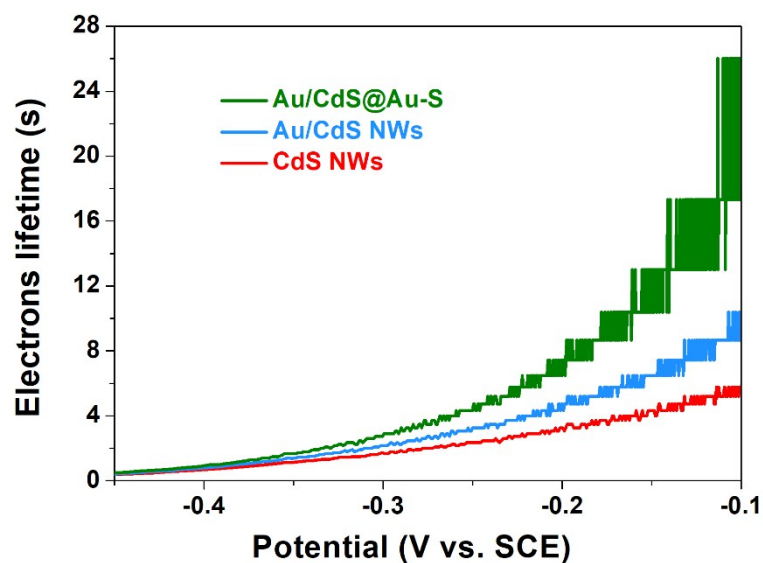

**Fig. S21** The electrons lifetime determined from the decay of open circuit potential of bare CdS NWs, Au/CdS NWs and Au/CdS@Au-S photocatalysts.

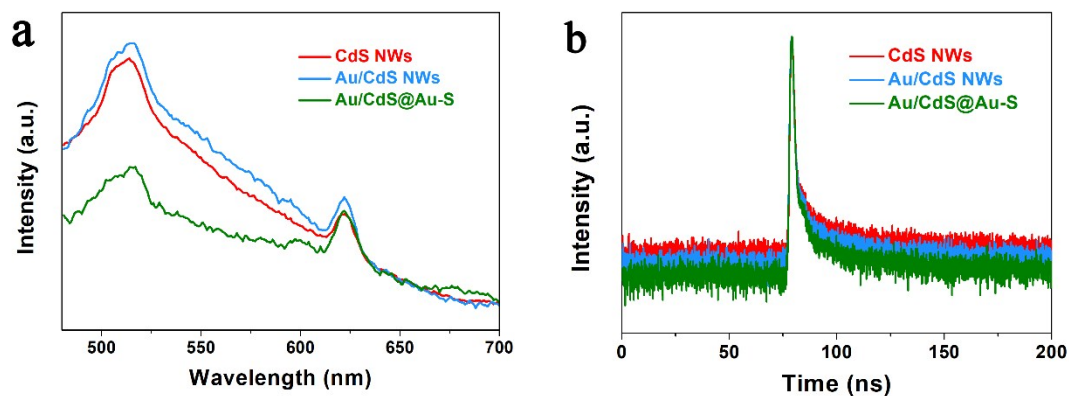

**Fig. S22** (a) PL spectra of photocatalyst at room temperature, (b) TRPL spectra of photocatalyst and the excitation wavelength is 380 nm.

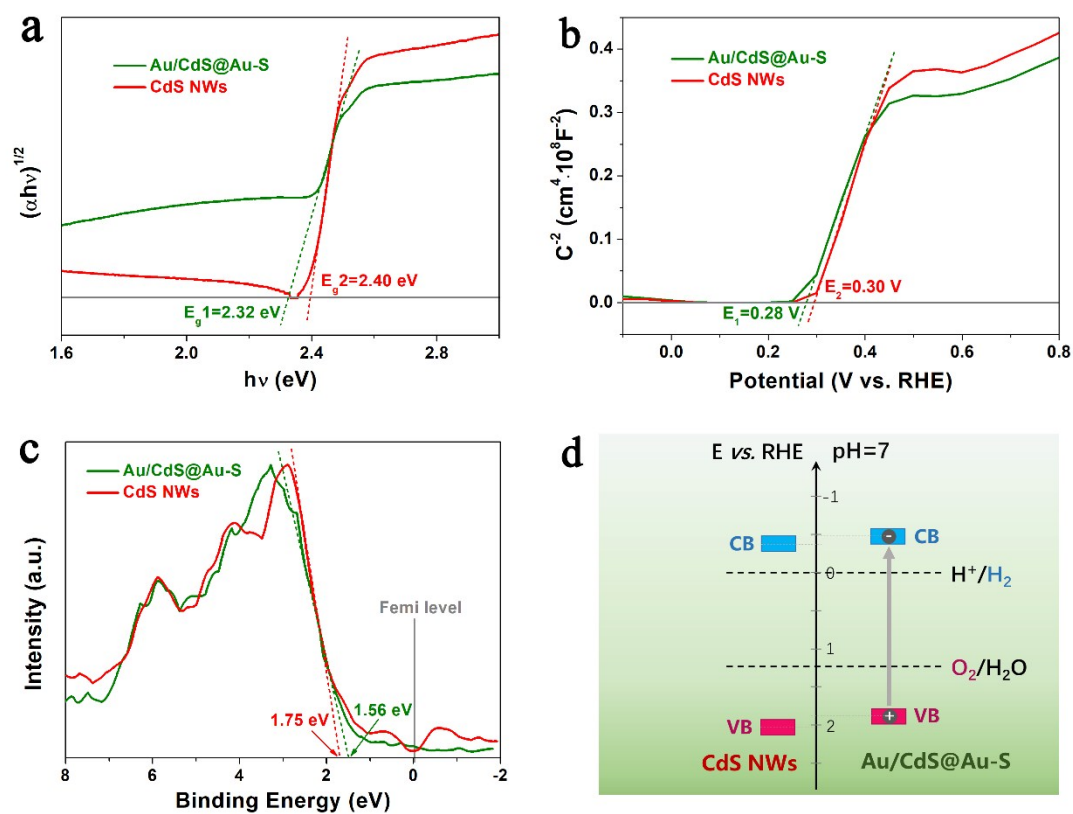

**Fig. S23** (a) The band gap of catalyst, (b) the Mott-Schottky plots of catalyst, (c) the XPS valence spectra and (d) the band position from above results.

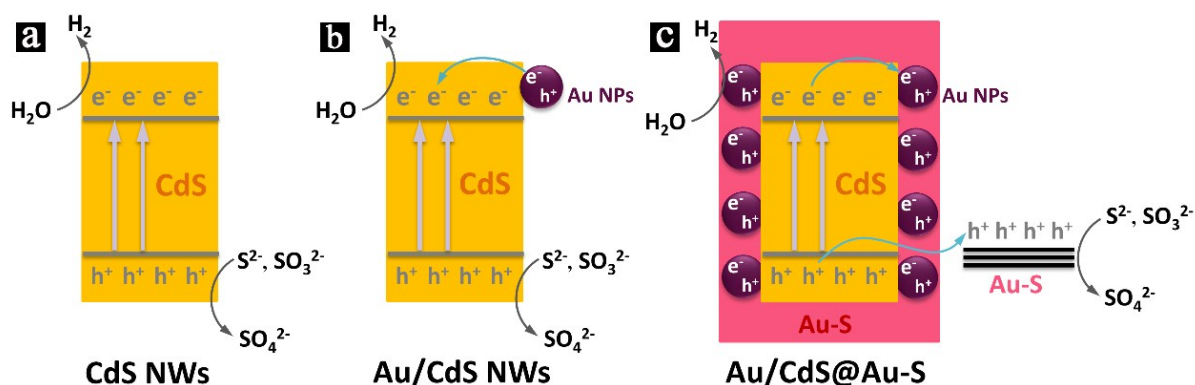

**Fig. S24** The electron transfer process during photocatalytic reaction. In CdS system, as shown in Fig. S24a, it is a traditional photocatalytic mechanism. In Au/CdS system (Fig. S24b), the electron transfer process can be described as follow: under light irradiation ( $\lambda > 420$  nm), both Au NPs and CdS NWs are excited, and the electron transfer to the CB of CdS NWs from Au NPs and the VB of CdS NWs, which can be confirmed our experiments and then the electrons react with **absorbed**  $\text{H}^+$  to produce  $\text{H}_2$ . The remaining holes will direct react with the pairs of  $\text{Na}_2\text{S}$  and  $\text{Na}_2\text{SO}_3$  on the surface of CdS NWs. In Au/CdS@Au-S system (Fig. S24c), under visible light irradiation ( $\lambda > 420$  nm), electrons are excited from the Au NPs and valence band (VB) of CdS NWs in Au/CdS@Au-S to the conduction band (CB) of CdS NWs, thereby forming the photogenerated electron-hole pairs. Simultaneously, the photogenerated positive holes, first are trapped by Au-S layer, and then quenched by scavenger ( $\text{Na}_2\text{S}$  and  $\text{Na}_2\text{SO}_3$ ). On the other hand, due to the strong hole trapping ability of Au-S, to lead the rest of photogenerated electrons from CdS NWs can easily transfer to the Au NPs with a low lying Fermi level, by which the lifetime of photogenerated electrons is significantly improved. As a result, the adsorbed proton can be effectively reduced to hydrogen by accepting photogenerated electrons.<sup>S5,S6</sup>

**Tab. S1** The hydrogen production activity of CdS, Au/CdS and Au/CdS@Au-S under different light source irradiation.

| <i>Catalysts</i> | <i>Conditions</i>             | <i>Activity (<math>\mu\text{mol}</math>)</i> |
|------------------|-------------------------------|----------------------------------------------|
| CdS              | $\lambda \leq 520 \text{ nm}$ | 33.9                                         |
|                  | $\lambda > 520 \text{ nm}$    | Undetected                                   |
| Au/CdS@Au-S      | $\lambda \leq 520 \text{ nm}$ | 1640.9                                       |
|                  | $\lambda > 520 \text{ nm}$    | 10.2                                         |

**Tab. S2** The hydrogen production activity and AQEs in recent papers.

| <i>System</i>                           | <i>Conditions</i>                                                                                                                                                                    | <i>Activity (<math>\mu\text{mol}\cdot\text{g}^{-1}\cdot\text{h}^{-1}</math>)</i> | <i>AQE/IPCE (%)</i>       | <i>Ref.</i>      |
|-----------------------------------------|--------------------------------------------------------------------------------------------------------------------------------------------------------------------------------------|----------------------------------------------------------------------------------|---------------------------|------------------|
| Au/CdS                                  | 10%, lactic acid, $\lambda > 420 \text{ nm}$                                                                                                                                         | 6385                                                                             | 2.4<br>at 420 nm          | S7               |
| Au@CdS                                  | $0.1 \text{ mol}\cdot\text{L}^{-1} \text{ Na}_2\text{SO}_3 + 0.1 \text{ mol}\cdot\text{L}^{-1} \text{ Na}_2\text{S}$ ,<br>$\lambda > 420 \text{ nm}$                                 | 383.6                                                                            | N/A                       | S8               |
| BP-Au-CdS                               | $0.35 \text{ mol}\cdot\text{L}^{-1} \text{ Na}_2\text{S} + 0.25 \text{ mol}\cdot\text{L}^{-1} \text{ Na}_2\text{SO}_3$ ,<br>solar light                                              | 10100                                                                            | 5.3<br>at 420 nm          | S9               |
| Au-CdS/ZnS-RGO                          | $0.35 \text{ mol}\cdot\text{L}^{-1} \text{ Na}_2\text{S} + 0.25 \text{ mol}\cdot\text{L}^{-1} \text{ Na}_2\text{SO}_3$ ,<br>$\lambda > 420 \text{ nm}$                               | 9960                                                                             | N/A                       | S10              |
| Au-Pt-CdS                               | $0.35 \text{ mol}\cdot\text{L}^{-1} \text{ Na}_2\text{S} + 0.25 \text{ mol}\cdot\text{L}^{-1} \text{ Na}_2\text{SO}_3$ ,<br>$\lambda > 420 \text{ nm}$                               | 778                                                                              | 0.06<br>at 440 nm         | S11              |
| Au-CdS/ZnS                              | $0.35 \text{ mol}\cdot\text{L}^{-1} \text{ Na}_2\text{S} + 0.25 \text{ mol}\cdot\text{L}^{-1} \text{ Na}_2\text{SO}_3$ ,<br>$\lambda > 400 \text{ nm}$                               | 675                                                                              | N/A                       | S12              |
| NYF/Au/CdS                              | 12%, ethanol, AM 1.5G                                                                                                                                                                | 230                                                                              | N/A                       | S13              |
| Au/CdS                                  | $\text{SO}_3^{2-}$ and $\text{S}^{2-}$ , $\lambda > 400 \text{ nm}$                                                                                                                  | 7300                                                                             | N/A                       | S14              |
| CdS-Au-HCNS                             | 3% Pt, 10% TEOA, $\lambda > 455 \text{ nm}$                                                                                                                                          | 13850                                                                            | 8.7<br>at 420 nm          | S15              |
| g-C <sub>3</sub> N <sub>4</sub> /Au/CdS | 20%, lactic acid, $\lambda > 420 \text{ nm}$                                                                                                                                         | 1060                                                                             | N/A                       | S16              |
| <b>Au/CdS@Au-S</b>                      | <b><math>0.1 \text{ mol}\cdot\text{L}^{-1} \text{ Na}_2\text{SO}_3 + 0.1 \text{ mol}\cdot\text{L}^{-1} \text{ Na}_2\text{S}</math>,<br/><math>\lambda &gt; 420 \text{ nm}</math></b> | <b>11000</b>                                                                     | <b>19.1<br/>at 430 nm</b> | <b>This work</b> |

## References

- S1. I. Majeed, M. A. Nadeem, E. Hussain, A. Badshah, R. Gilani and M. A. Nadeem, *International Journal of Hydrogen Energy*, 2017, 42, 3006-3018.
- S2. J. J. Li, Y. A. Wang, W. Z. Guo, J. C. Keay, T. D. Mishima, M. B. Johnson and X. G. Peng, *Journal of the American Chemical Society*, 2003, 125, 12567-12575.
- S3. J. Liu, Y. Liu, N. Liu, Y. Han, X. Zhang, H. Huang, Y. Lifshitz, S.-T. Lee, J. Zhong and Z. Kang, *Science*, 2015, 347, 970-974.
- S4. B. Tian, W. Gao, X. Zhang, Y. Wu and G. Lu, *Applied Catalysis B-Environmental*, 2018, 221, 618-625.
- S5. S. Yu, X.-B. Fan, X. Wang, J. Li, Q. Zhang, A. Xia, S. Wei, L.-Z. Wu, Y. Zhou and G. R. Patzke, *Nature Communications*, 2018, 9.
- S6. Y. P. Xie, Z. B. Yu, G. Liu, X. L. Ma and H.-M. Cheng, *Energy & Environmental Science*, 2014, 7, 1895-1901.
- S7. J. Xu, W.-M. Yang, S.-J. Huang, H. Yin, H. Zhang, P. Radjenovic, Z.-L. Yang, Z.-Q. Tian and J.-F. Li, *Nano Energy*, 2018, 49, 363-371.
- S8. X. Ma, K. Zhao, H. Tang, Y. Chen, C. Lu, W. Liu, Y. Gao, H. Zhao and Z. Tang, *Small*, 2014, 10, 4664-4670.
- S9. X. Cai, L. Mao, S. Yang, K. Han and J. Zhang, *Acs Energy Letters*, 2018, 3, 932-939.
- S10. S. Kai, B. Xi, X. Liu, L. Ju, P. Wang, Z. Feng, X. Ma and S. Xiong, *Journal of Materials Chemistry A*, 2018, 6, 2895-2899.
- S11. L. Ma, K. Chen, F. Nan, J.-H. Wang, D.-J. Yang, L. Zhou and Q.-Q. Wang, *Advanced Functional Materials*, 2016, 26, 6076-6083.
- S12. T.-T. Zhuang, Y. Liu, M. Sun, S.-L. Jiang, M.-W. Zhang, X.-C. Wang, Q. Zhang, J. Jiang and S.-H. Yu, *Angewandte Chemie-International Edition*, 2015, 54, 11495-11500.
- S13. W. Feng, L. Zhang, Y. Zhang, Y. Yang, Z. Fang, B. Wang, S. Zhang and P. Liu, *Journal of Materials Chemistry A*, 2017, 5, 10311-10320.
- S14. Q. Zhao, M. Ji, H. Qian, B. Dai, L. Weng, J. Gui, J. Zhang, M. Ouyang and H. Zhu, *Advanced Materials*, 2014, 26, 1387-1392.

- S15. D. Zheng, C. Pang and X. Wang, *Chemical Communications*, 2015, 51, 17467-17470.
- S16. W. Li, C. Feng, S. Dai, J. Yue, F. Hua and H. Hou, *Applied Catalysis B-Environmental*, 2015, 168, 465-471.
